# Supplementary material for: Maternal autistic traits and antenatal pain by cross-sectional analysis of the Japan Environment and Children’s Study
Source: PubMed Central journal article supplement (PMC10101964; doi:10.1038/s41598-023-32945-2), 2023-04-13
Supplement: 41598_2023_32945_MOESM2_ESM.pdf [file 41598_2023_32945_MOESM2_ESM.pdf]

**Table S1. Participants' characteristics by the Autism-Spectrum Quotient short form (Japanese version) cut-off of point (N = 89,068)**

|                                                            | Total      |      | < AQ-10 Cut-off |      | ≥ AQ-10 Cut-off |      | P value |
|------------------------------------------------------------|------------|------|-----------------|------|-----------------|------|---------|
|                                                            | n = 89,068 |      | n = 86,667      |      | n = 2,401       |      |         |
|                                                            | n          | %    | n               | %    | n               | %    |         |
| <b>Antenatal pain</b>                                      |            |      |                 |      |                 |      | 0.002   |
| None                                                       | 14,057     | 15.8 | 13,720          | 15.8 | 337             | 14.0 |         |
| Very mild                                                  | 20,606     | 23.1 | 20,064          | 23.2 | 542             | 22.6 |         |
| Mild                                                       | 34,515     | 38.8 | 33,593          | 38.8 | 922             | 38.4 |         |
| Moderate                                                   | 15,665     | 17.6 | 15,204          | 17.5 | 461             | 19.2 |         |
| Severe                                                     | 3,870      | 4.3  | 3,749           | 4.3  | 121             | 5.0  |         |
| Very severe                                                | 355        | 0.4  | 337             | 0.4  | 18              | 0.7  |         |
| <b>Age, years</b>                                          |            |      |                 |      |                 |      | <0.001  |
| 16-19                                                      | 952        | 1.1  | 910             | 1.0  | 42              | 1.7  |         |
| 20-24                                                      | 8,965      | 10.1 | 8672            | 10.0 | 293             | 12.2 |         |
| 25-29                                                      | 26,094     | 29.3 | 25350           | 29.2 | 744             | 31.0 |         |
| 30-34                                                      | 31,125     | 34.9 | 30327           | 35.0 | 798             | 33.2 |         |
| 35-39                                                      | 18,684     | 21.0 | 18237           | 21.0 | 447             | 18.6 |         |
| ≥40                                                        | 3,248      | 3.6  | 3171            | 3.7  | 77              | 3.2  |         |
| <b>Pre-pregnancy body mass index ≥25, kg/m<sup>2</sup></b> |            |      |                 |      |                 |      | 0.68    |
| <18.5                                                      | 14,375     | 16.1 | 13970           | 16.1 | 405             | 16.9 |         |
| 18.5 to 24.9                                               | 65,322     | 73.3 | 63570           | 73.3 | 1752            | 73.0 |         |
| 25.0 to 29.9                                               | 7,149      | 8.0  | 6959            | 8.0  | 190             | 7.9  |         |
| ≥30                                                        | 2,187      | 2.5  | 2133            | 2.5  | 54              | 2.2  |         |
| Missing                                                    | 35         | 0.04 | 35              | 0.04 | 0               | 0    |         |
| <b>Smoking during pregnancy</b>                            |            |      |                 |      |                 |      | 0.07    |
| Never smoker                                               | 51,230     | 57.5 | 49906           | 57.6 | 1324            | 55.1 |         |
| Ex-smoker                                                  | 33,191     | 37.3 | 32258           | 37.2 | 933             | 38.9 |         |
| Smoker                                                     | 3,948      | 4.4  | 3826            | 4.4  | 122             | 5.1  |         |
| Missing                                                    | 699        | 0.8  | 677             | 0.8  | 22              | 0.9  |         |
| <b>Drinking during pregnancy</b>                           |            |      |                 |      |                 |      | 0.01    |
| Never drinker                                              | 29,517     | 33.1 | 28702           | 33.1 | 815             | 33.9 |         |
| Ex-drinker                                                 | 56,403     | 63.3 | 54929           | 63.4 | 1474            | 61.4 |         |
| Drinker                                                    | 2,434      | 2.7  | 2350            | 2.7  | 84              | 3.5  |         |
| Missing                                                    | 714        | 0.8  | 686             | 0.8  | 28              | 1.2  |         |

|                                                                                          |        |      |       |      |      |      |        |
|------------------------------------------------------------------------------------------|--------|------|-------|------|------|------|--------|
| <b>Amounts of physical activity during pregnancy, metabolic equivalent hours per day</b> |        |      |       |      |      |      | 0.003  |
| Quintile 1: 0                                                                            | 19,940 | 22.4 | 19330 | 22.3 | 610  | 25.4 |        |
| Quintile 2: 0.001–0.709                                                                  | 14,678 | 16.5 | 14298 | 16.5 | 380  | 15.8 |        |
| Quintile 3: 0.710–1.715                                                                  | 16,406 | 18.4 | 15964 | 18.4 | 442  | 18.4 |        |
| Quintile 4: 1.716–4.717                                                                  | 17,283 | 19.4 | 16854 | 19.4 | 429  | 17.9 |        |
| Quintile 5: 4.718–729.943                                                                | 16,660 | 18.7 | 16245 | 18.7 | 415  | 17.3 |        |
| Missing                                                                                  | 4,101  | 4.6  | 3976  | 4.6  | 125  | 5.2  |        |
| <b>Education</b>                                                                         |        |      |       |      |      |      |        |
| Less than high school                                                                    | 4,184  | 4.7  | 4028  | 4.6  | 156  | 6.5  |        |
| High school                                                                              | 27,711 | 31.1 | 26827 | 31.0 | 884  | 36.8 |        |
| College/vocational school                                                                | 37,376 | 42.0 | 36507 | 42.1 | 869  | 36.2 |        |
| University                                                                               | 18,132 | 20.4 | 17703 | 20.4 | 429  | 17.9 |        |
| Graduate school                                                                          | 1,309  | 1.5  | 1263  | 1.5  | 46   | 1.9  |        |
| Missing                                                                                  | 356    | 0.4  | 339   | 0.4  | 17   | 0.7  |        |
| <b>Marital status</b>                                                                    |        |      |       |      |      |      | <0.001 |
| Married or common-habits                                                                 | 84,721 | 95.1 | 82497 | 95.2 | 2224 | 92.6 |        |
| Single                                                                                   | 3,202  | 3.6  | 3072  | 3.5  | 130  | 5.4  |        |
| Divorced                                                                                 | 751    | 0.8  | 720   | 0.8  | 31   | 1.3  |        |
| Widowed                                                                                  | 12     | 0.0  | 12    | 0.0  | 0    | 0.0  |        |
| Missing                                                                                  | 382    | 0.4  | 366   | 0.4  | 16   | 0.7  |        |
| <b>Equivalentized income, million Japanese yen</b>                                       |        |      |       |      |      |      | <0.001 |
| Quintile 1: 0.19–1.14                                                                    | 14,050 | 15.8 | 13605 | 15.7 | 445  | 18.5 |        |
| Quintile 2: 1.15–1.86                                                                    | 19,025 | 21.4 | 18544 | 21.4 | 570  | 23.7 |        |
| Quintile 3: 1.87–2.99                                                                    | 18,538 | 20.8 | 18091 | 20.9 | 447  | 18.6 |        |
| Quintile 4: 3.00–4.03                                                                    | 13,266 | 14.9 | 12917 | 14.9 | 349  | 14.5 |        |
| Quintile 5: 4.04–1.77                                                                    | 17,800 | 20.0 | 17407 | 20.1 | 393  | 16.4 |        |
| Missing                                                                                  | 6,389  | 7.2  | 6192  | 7.1  | 197  | 8.2  |        |
| <b>Current employment status</b>                                                         |        |      |       |      |      |      | <0.001 |
| Permanent full-time employee                                                             | 27,323 | 30.7 | 26644 | 30.7 | 679  | 28.3 |        |
| Self-employed                                                                            | 3,089  | 3.5  | 3018  | 3.5  | 71   | 3.0  |        |
| Temporary full-time employee                                                             | 1,152  | 1.3  | 1122  | 1.3  | 30   | 1.2  |        |
| Full-time homemaker or leave of absence                                                  | 39,424 | 44.3 | 38281 | 44.2 | 1143 | 47.6 |        |
| Part-time employee                                                                       | 14,466 | 16.2 | 14101 | 16.3 | 365  | 15.2 |        |
| Unemployed                                                                               | 1,236  | 1.4  | 1187  | 1.4  | 49   | 2.0  |        |
| Others                                                                                   | 1,683  | 1.9  | 1644  | 1.9  | 39   | 1.6  |        |
| Missing                                                                                  | 695    | 0.8  | 670   | 0.8  | 25   | 1.0  |        |
| <b>Number of fetuses</b>                                                                 |        |      |       |      |      |      | 0.94   |
| Singleton pregnancy                                                                      | 867    | 1.0  | 844   | 1.0  | 23   | 1.0  |        |

|                                                 |        |       |       |       |      |      |        |
|-------------------------------------------------|--------|-------|-------|-------|------|------|--------|
| Multiple pregnancy                              | 88,201 | 99.0  | 85823 | 99.0  | 2378 | 99.0 |        |
| <b>History of delivery</b>                      |        |       |       |       |      |      | <0.001 |
| Yes                                             | 43,656 | 49.0  | 42608 | 49.2  | 1048 | 43.6 |        |
| No                                              | 45,408 | 51.0  | 44055 | 50.8  | 1353 | 56.4 |        |
| Missing                                         | 4      | 0.004 | 4     | 0.005 | 0    | 0    |        |
| <b>History of anxiety disorder</b>              |        |       |       |       |      |      | <0.001 |
| Yes                                             | 2,531  | 2.8   | 2397  | 2.8   | 134  | 5.6  |        |
| No                                              | 86,537 | 97.2  | 84270 | 97.2  | 2267 | 94.4 |        |
| <b>History of depression</b>                    |        |       |       |       |      |      | <0.001 |
| Yes                                             | 2,703  | 3.0   | 2557  | 3.0   | 146  | 6.1  |        |
| No                                              | 86,365 | 97.0  | 84110 | 97.0  | 2255 | 93.9 |        |
| <b>History of schizophrenia</b>                 |        |       |       |       |      |      | <0.001 |
| Yes                                             | 151    | 0.2   | 139   | 0.2   | 12   | 0.5  |        |
| No                                              | 88,917 | 99.8  | 86528 | 99.8  | 2389 | 99.5 |        |
| <b>History of other psychological disorders</b> |        |       |       |       |      |      | <0.001 |
| Yes                                             | 871    | 1.0   | 827   | 1.0   | 44   | 1.8  |        |
| No                                              | 88,197 | 99.0  | 85840 | 99.0  | 2357 | 98.2 |        |
| <b>Feeling when made aware of the pregnancy</b> |        |       |       |       |      |      | <0.001 |
| Very happy                                      | 58,346 | 65.5  | 56937 | 65.7  | 1409 | 58.7 |        |
| Unintended pregnancy but felt happy             | 22,414 | 25.2  | 21762 | 25.1  | 652  | 27.2 |        |
| Unintended pregnancy and confused               | 6,090  | 6.8   | 5863  | 6.8   | 227  | 9.5  |        |
| Upset                                           | 502    | 0.6   | 469   | 0.5   | 33   | 1.4  |        |
| No specific feeling                             | 413    | 0.5   | 392   | 0.5   | 21   | 0.9  |        |
| Other feeling                                   | 947    | 1.1   | 905   | 1.0   | 42   | 1.7  |        |
| Missing                                         | 356    | 0.4   | 339   | 0.4   | 17   | 0.7  |        |
| <b>Depth of sleep over the past month</b>       |        |       |       |       |      |      | <0.001 |
| Quite lightly                                   | 6,378  | 7.2   | 6147  | 7.1   | 231  | 9.6  |        |
| Lightly                                         | 37,301 | 41.9  | 36302 | 41.9  | 999  | 41.6 |        |
| Normal                                          | 35,309 | 39.6  | 34406 | 39.7  | 903  | 37.6 |        |
| Deeply                                          | 8,241  | 9.3   | 8036  | 9.3   | 205  | 8.5  |        |
| Quite deeply                                    | 1,581  | 1.8   | 1530  | 1.8   | 51   | 2.1  |        |
| Missing                                         | 258    | 0.3   | 246   | 0.3   | 12   | 0.5  |        |
| <b>Psychological distress during pregnancy</b>  |        |       |       |       |      |      | <0.001 |
| Yes                                             | 2,907  | 3.3   | 2692  | 3.1   | 215  | 9.0  |        |
| No                                              | 85,638 | 96.1  | 83470 | 96.3  | 2168 | 90.3 |        |
| Missing                                         | 523    | 0.6   | 505   | 0.6   | 18   | 0.7  |        |

*Abbreviation:* AQ-10; Autism-Spectrum Quotient short form. The Kessler Psychological Distress Scale (K6) score  $\geq 13$  was interpreted as indicating the presence of psychological distress during pregnancy. Chi-square analyses

were conducted for categorical data.

**Table S2. Odds ratios (95% confidence intervals) of antenatal pain by quartiles of the Autism-Spectrum Quotient sort form (Japanese version) score (N = 89,068)**

|                                           | Model 1             |                          | Model 2             |                          | Model 3             |                          |
|-------------------------------------------|---------------------|--------------------------|---------------------|--------------------------|---------------------|--------------------------|
|                                           | Mild pain           | Moderate-to-severe pain  | Mild pain           | Moderate-to-severe pain  | Mild pain           | Moderate-to-severe pain  |
| <b>Quartiles of AQ-10-J score</b>         |                     |                          |                     |                          |                     |                          |
| <b>1 (low): n=20,107</b>                  | <b>12,577</b>       | <b>4,099</b>             | 14,063              | 4,975                    |                     |                          |
| <b>OR (95% CI)</b>                        | 1 (reference)       | 1 (reference)            | 1 (reference)       | 1 (reference)            | 1 (reference)       | 1 (reference)            |
| <b>2: n=22,659</b>                        | 14,063              | 4,975                    | 14,063              | 4,975                    | 14,063              | 4,975                    |
| <b>OR (95% CI)</b>                        | 1.06 (1.01–1.12)*   | 1.15 (1.08–1.23)***      | 1.06 (1.01–1.12)*   | 1.14 (1.07–1.22)***      | 1.06 (1.00–1.11)*   | 1.12 (1.05–1.19)***      |
| <b>3: n=20,410</b>                        | 12,601              | 4,615                    | 12,601              | 4,615                    | 12,601              | 4,615                    |
| <b>OR (95% CI)</b>                        | 1.08 (1.02–1.14)**  | 1.21 (1.13–1.29)***      | 1.08 (1.02–1.14)**  | 1.20 (1.12–1.27)***      | 1.07 (1.01–1.13)*   | 1.15 (1.08–1.23)***      |
| <b>4 (high): n=23,491</b>                 | 14,416              | 5,601                    | 14,416              | 5,601                    | 14,416              | 5,601                    |
| <b>OR (95% CI)</b>                        | 1.13 (1.08–1.20)*** | 1.34 (1.26–1.42)***      | 1.14 (1.08–1.20)*** | 1.31 (1.23–1.40)***      | 1.11 (1.05–1.17)*** | 1.21 (1.14–1.29)***      |
| <b>≥cut-off: n=2,401</b>                  | 1,464               | 600                      | 1,464               | 600                      | 1,464               | 600                      |
| <b>OR (95% CI)</b>                        | 1.19 (1.05–1.34)**  | 1.47 (1.28–1.69)***      | 1.20 (1.06–1.36)**  | 1.45 (1.26–1.68)***      | 1.15 (1.01–1.30)*   | 1.23 (1.06–1.42)**       |
| <b>P for linearity</b>                    | <0.001              | <0.001                   | <0.001              | <0.001                   | <0.001              | <0.001                   |
| <b>Regression coefficient (the slope)</b> | 0.045               | 0.113                    | 0.048               | 0.107                    | 0.035               | 0.055                    |
| <b>for ORs of AQ-10-J scoring groups</b>  |                     | (vs. mild pain, p=0.007) |                     | (vs. mild pain, p=0.004) |                     | (vs. mild pain, p=0.002) |

*Abbreviations:* AQ; Autism-Spectrum Quotient short form, OR; odds ratio. Model 1: Adjusted for age. Model 2: Adjusted for age, pre-pregnancy body mass index, smoking during pregnancy, drinking during pregnancy, physical activity, education, marital status, equivalized income, employment status, and multiple pregnancy. Model 3: Further adjusted for history of delivery, history of anxiety disorder, history of depression, history of schizophrenia, history of other psychological disorders, feeling when made aware

of the pregnancy, sleep depth, and psychological distress during pregnancy. Odds ratio was estimated by multinomial logistic regression analysis. P for linearity for the ORs for mild and moderate-to-severe pain by increase in AQ-10-J score were estimated using a general linear model. Regression coefficients for the ORs in the AQ-10-J scoring groups (i.e., slopes) between mild pain and moderate-to-severe pain were also tested using a general linear model. \*  $p < 0.05$ , \*\*  $p < 0.01$ , \*\*\*  $p < 0.001$

**Table S3. Odds ratios (95% confidence intervals) of antenatal pain by the Autism-Spectrum Quotient sort form (Japanese version) scoring group (N = 71,206)**

| AQ-10-J score                                                               | Model 1           |                                      | Model 2            |                                      |
|-----------------------------------------------------------------------------|-------------------|--------------------------------------|--------------------|--------------------------------------|
|                                                                             | Mild pain         | Moderate-to-severe pain              | Mild pain          | Moderate-to-severe pain              |
| <b>0: n=4,205</b>                                                           | 2,685             | 766                                  | 2,685              | 766                                  |
| <b>OR (95% CI)</b>                                                          | 1 (reference)     | 1 (reference)                        | 1 (reference)      | 1 (reference)                        |
| <b>1: n=12,714</b>                                                          | 8,046             | 2,363                                | 8,046              | 2,363                                |
| <b>OR (95% CI)</b>                                                          | 0.98 (0.89–1.08)  | 1.01 (0.90–1.14)                     | 0.98 (0.89–1.08)   | 1.01 (0.90–1.13)                     |
| <b>2: n=18,525</b>                                                          | 11,714            | 3,646                                | 11,714             | 3,646                                |
| <b>OR (95% CI)</b>                                                          | 1.04 (0.96–1.14)  | 1.14 (1.02–1.14)*                    | 1.05 (0.96–1.14)   | 1.13 (1.01–1.26)*                    |
| <b>3: n=16,282</b>                                                          | 10,273            | 3,273                                | 10,273             | 3,273                                |
| <b>OR (95% CI)</b>                                                          | 1.06 (0.97–1.16)  | 1.18 (1.06–1.32)**                   | 1.06 (0.97–1.16)   | 1.17 (1.05–1.31)**                   |
| <b>4: n=9,672</b>                                                           | 6,085             | 1,990                                | 6,085              | 1,990                                |
| <b>OR (95% CI)</b>                                                          | 1.07 (0.97–1.18)  | 1.22 (1.08–1.38)***                  | 1.08 (0.98–1.19)   | 1.21 (1.07–1.36)**                   |
| <b>5: n=5,425</b>                                                           | 3,461             | 1,117                                | 3,461              | 1,117                                |
| <b>OR (95% CI)</b>                                                          | 1.15 (1.03–1.28)* | 1.29 (1.13–1.47)***                  | 1.16 (1.04–1.30)** | 1.28 (1.11–1.46)***                  |
| <b>6: n=2,735</b>                                                           | 1,734             | 576                                  | 1,734              | 576                                  |
| <b>OR (95% CI)</b>                                                          | 1.15 (1.01–1.31)* | 1.32 (1.13–1.55)***                  | 1.16 (1.02–1.33)*  | 1.31 (1.12–1.54)***                  |
| <b>7-10: n=1,648</b>                                                        | 1,053             | 334                                  | 1,053              | 334                                  |
| <b>OR (95% CI)</b>                                                          | 1.13 (0.97–1.33)  | 1.24 (1.02–1.50)*                    | 1.15 (0.98–1.35)   | 1.25 (1.03–1.51)*                    |
| <b>P for linearity</b>                                                      | <0.001            | <0.001                               | <0.001             | <0.001                               |
| <b>Regression coefficient (the slope) for ORs of AQ-10-J scoring groups</b> | 0.025             | 0.044<br>(vs. mild pain,<br>p<0.001) | 0.027              | 0.045<br>(vs. mild pain,<br>p<0.001) |

*Abbreviations:* AQ-10-J; Japanese version of the Autism-Spectrum Quotient short form, OR; odds ratio. Model 1: Adjusted for age. Model 2: Adjusted for age, pre-pregnancy body mass index, smoking during pregnancy, drinking during pregnancy, physical activity, education, marital status, equivalized income, employment status, and multiple pregnancy. Odds ratio was estimated by multinomial logistic regression analysis. P for linearity for the ORs for mild and moderate-to-severe pain by increase in AQ-10-J score were estimated using a general linear model. Regression coefficients for the ORs in the AQ-10-J scoring groups (i.e., slopes) between mild pain and moderate-to-severe pain were also tested using a general linear model. \* p<0.05, \*\* p<0.01, \*\*\* p<0.001

**Table S4. Odds ratios (95% confidence intervals) of antenatal pain by quartiles of the Autism-Spectrum Quotient short form (Japanese version) score (N = 71,206)**

|                                                                             | Model 1             |                                      | Model 2             |                                      |
|-----------------------------------------------------------------------------|---------------------|--------------------------------------|---------------------|--------------------------------------|
|                                                                             | Mild pain           | Moderate-to-severe pain              | Mild pain           | Moderate-to-severe pain              |
| <b>Quartiles of AQ-10-J score</b>                                           |                     |                                      |                     |                                      |
| <b>1: n=16,919</b>                                                          | 10,731              | 3,129                                | 10,731              | 3,129                                |
| <b>OR (95% CI)</b>                                                          | 1 (reference)       | 1 (reference)                        | 1 (reference)       | 1 (reference)                        |
| <b>2: n=18,525</b>                                                          | 11,714              | 3,646                                | 11,714              | 3,646                                |
| <b>OR (95% CI)</b>                                                          | 1.06 (0.99–1.12)    | 1.13 (1.05–1.21)***                  | 1.06 (1.00–1.12)    | 1.12 (1.05–1.21)***                  |
| <b>3: n=16,282</b>                                                          | 10,273              | 3,273                                | 10,273              | 3,273                                |
| <b>OR (95% CI)</b>                                                          | 1.07 (1.01–1.14)*   | 1.17 (1.09–1.26)***                  | 1.08 (1.02–1.14)*   | 1.17 (1.09–1.25)***                  |
| <b>4: n=17,832</b>                                                          | 11,280              | 3,683                                | 11,280              | 3,683                                |
| <b>OR (95% CI)</b>                                                          | 1.12 (1.06–1.19)*** | 1.25 (1.16–1.34)***                  | 1.13 (1.07–1.20)*** | 1.24 (1.15–1.33)***                  |
| <b>≥cut-off: n=1,648</b>                                                    | 1,053               | 334                                  | 1,053               | 334                                  |
| <b>OR (95% CI)</b>                                                          | 1.15 (0.99–1.32)    | 1.23 (1.04–1.46)*                    | 1.17 (1.02–1.35)*   | 1.24 (1.05–1.47)*                    |
| <b>P for linearity</b>                                                      | <0.001              | <0.001                               | <0.001              | <0.001                               |
| <b>Regression coefficient (the slope) for ORs of AQ-10-J scoring groups</b> | 0.036               | 0.058<br>(vs. mild pain,<br>p=0.003) | 0.041               | 0.060<br>(vs. mild pain,<br>p=0.014) |

*Abbreviations:* AQ-10-J; Japanese version of Autism-Spectrum Quotient short form, OR; odds ratio. Model 1: Adjusted for age. Model 2: Adjusted for age, pre-pregnancy body mass index, smoking during pregnancy, drinking during pregnancy, physical activity, education, marital status, equivalized income, employment status, and multiple pregnancy. Odds ratio was estimated by multinomial logistic regression analysis. P for linearity for the ORs for mild and moderate-to-severe pain by increase in AQ-10-J score were estimated using a general linear model. Regression coefficients for the ORs in the AQ-10-J scoring groups (i.e., slopes) between mild pain and moderate-to-severe pain were also tested using a general linear model. \* p<0.05, \*\* p<0.01, \*\*\* p<0.001
